# Supplementary figures and images for: Regulation of Candida glabrata oxidative stress resistance is adapted to host environment
Source: PubMed Central journal article supplement — FEBS Lett. 2011 Jan 21;585(2):319–27. doi: 10.1016/j.febslet.2010.12.006 (PMC3022126; doi:10.1016/j.febslet.2010.12.006), 2011-01-21

Figure S1

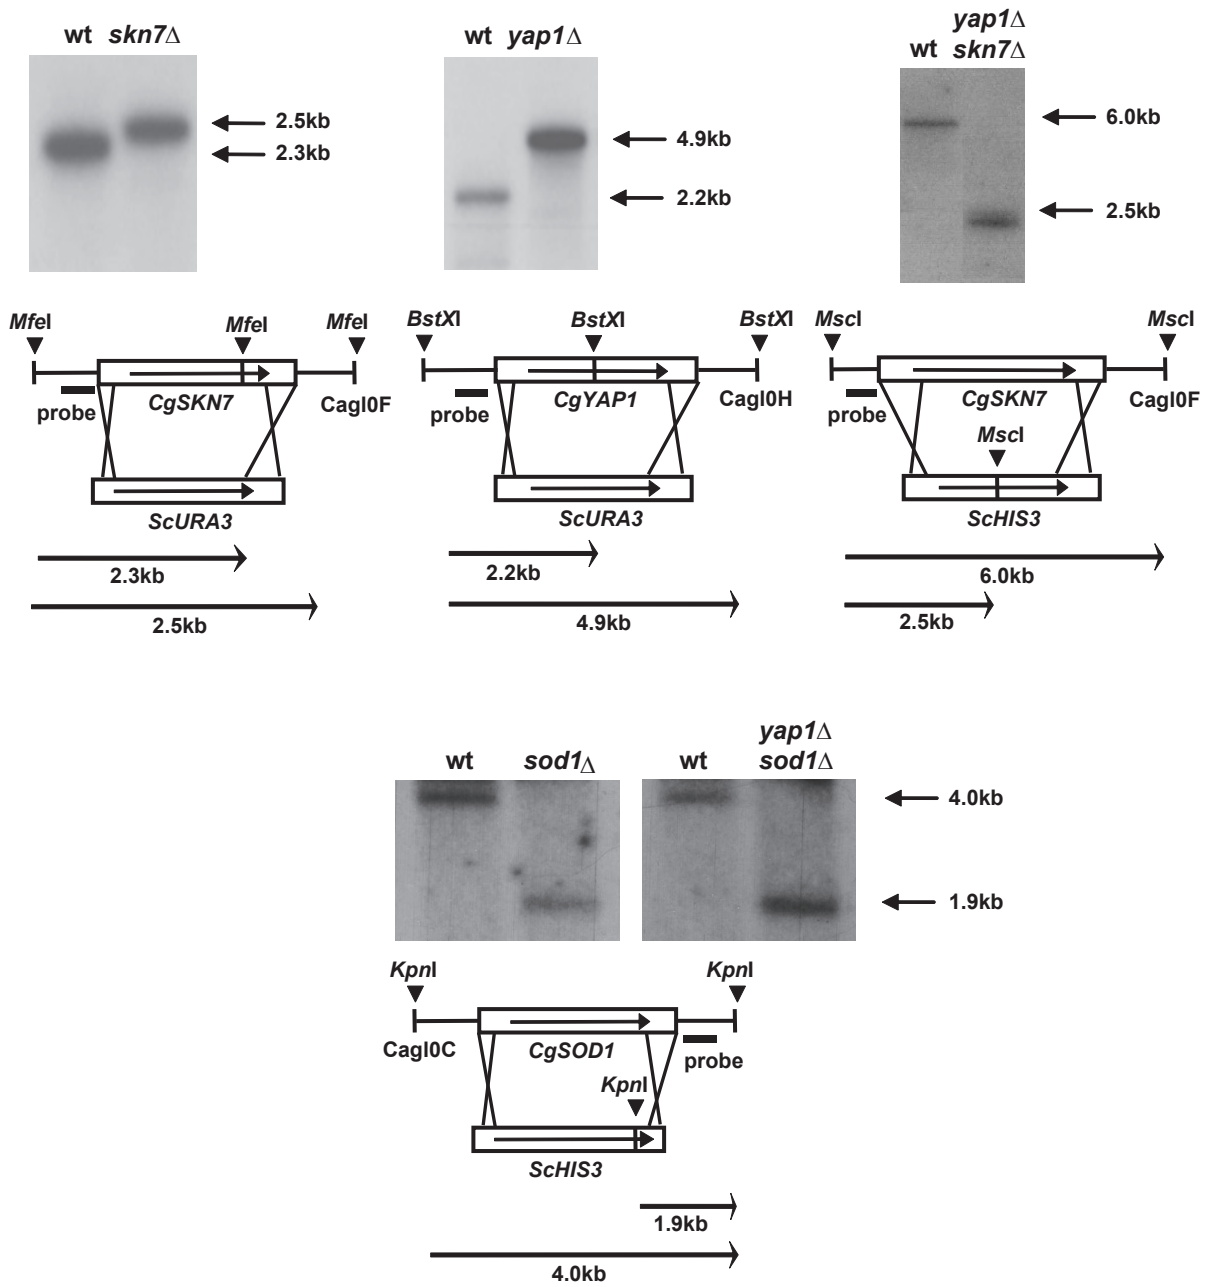

Supplement: mmc1.pdf [file mmc1.pdf]
